# Supplementary material for: Efficient reduction catalysis of viologen-bound iron porphyrin and its application to six-electron reduction of nitrobenzene to aniline †
Source: Royal Society of Chemistry journal article supplement (doi:10.1039/b000146p), 2000-01-01
Supplement: b000146p.doc [file b000146p.doc]

**Supplementary materials**

**Efficient Reduction Catalysis of Viologen-bound Iron Porphyrin and Its Application to Six-electron Reduction of Nitrobenzene to Aniline**

Shigeyoshi Sakaki,* Hiroaki Koga, Kou-ichiro Tao, Takafumi Yamashita, Tetsuro Iwashita, and Taisuke Hamada

*Department of Applied Chemistry and Biochemistry, Faculty of Engineering, Kumamoto University, Kurokami, Kumamoto 860-8555 Japan*

Oxygen-saturated methanol;

After methanol was thoroughly degassed through five-cycles of freeze-pump-thaw in a vacuum line, it was supplied oxygen gas. Then, it was kept at 15_C with bubbling oxygen gas through a capillary tube for 25 min. The oxygen-saturated methanol contains 9.49 x 10-3 mol/l of oxygen molecule, which was evaluated from the solubility of oxygen gas into methanol (Ed. by Chemical Society of Japan, "Kagaku Binran (Japanese)", Maruzen Co. Ltd., 1984, vol. II, p.164).

Synthesis of 5-{4-[3-(1'-methyl-4,4'-bipyridino)-ethylcarboxamido]phenyl}-10,15,20-triphenylporphyrin iron trichloride, [FeCl(mvep-TPP)]Cl2 **1**

**1** was synthesized through 5-(p-nitrophenyl)-10,15,20-triphenylporphyrin (**TPP-NO2**), 5-(p-aminophenyl)-10,15,20-triphenylporphyrin (**TPP-NH2**), 5-{4-(3-bromo-ethylcarboxamido)phenyl}-10,15,20-triphenylprophyrin (**TPP-Br**), and 5-{4-[3-(1'-methyl-4,4'-bipyridino)ethylcarboxamido]phenyl}-10,15,20-triphenylporphyrin (**mvep-TPP**). The synthesis is described in detail, as follows:

5-(p-nitrophenyl)-10,15,20-triphenylporphyrin **TPP-NO2**;

An acetic acid solution (1 l) containing p-nitrobenzaldehyde (0.125 mol), benzaldehyde (0.376 mol), and pyrrole (0.50 mol) was refluxed at 140_C for 0.5 h. Then, the solution was cooled to 30_C to yield the crude violet crystals. The crude products were washed with methanol, and then purified through column chromatography (Wako gel C-300; eluent=chloroform-hexane (7:3 v/v)). Evaporation of solvent from the second fraction left violet crystals. Recrystallization of the crystals from chloroform-hexane yielded violet crystals. They were dried at 100_C under vacuum; yield 364mg (0.44%).

Elemental Analysis: H; 4.40 (4.43), C; 80.17 (80.10), N; 10.63 (10.62), where in parentheses are calcd. for C44H29N5O2.

NMR; 8.86 (m, 8H), 8.66 (d, 2H), 8.41 (d, 2H), 8.22 (d, 6H), 7.79 (m, 9H), -2.80 (s, 2H).

5-(p-aminophenyl)-10,15,20-triphenylporphyrin **TPP-NH2**;

A conc. hydrochloric acid (18 ml) containing **TPP-NO2** (300 mg; 0.455 mmol) and SnCl2_2H2O (0.62 g; 2.74 mmol) was stirred at 70_C for 1 h. Then, it was put in an ice bath, and its pH was adjusted to 10 by adding conc. ammonia. After addition of chloroform (6 ml), it was stirred for 1 h. The chloroform layer was washed with water, and stored in a refrigerator with Na2SO4. After removing Na2SO4 through filtration, evaporation of chloroform left crude violet crystals. These crystals were purified through column chromatography (Wako gel C-300; eluent=chloroform-hexane (8:2 v/v)). Evaporation of solvent from the second fraction left violet crystals. Recrystallization of the crystals from dicholormethane-hexane yielded violet crystals. These crystals were dried at 100_C under vacuum; Yield 260 mg (87.4%).

Elemental Analysis: H; 5.11 (4.96), C; 84.44 (83.91), N; 11.03 (11.12), where in parentheses are calcd. for C44H31N5.

NMR; 9.02 (m, 8H), 8.39 (d, 2H), 8.15 (d, 2H), 7.93 (m, 9H), 7.20 (d, 2H), 5.60 (d, H),

-2.58 (s, 2H).

5-{4-(3-bromoethylcarboxamido)phenyl}-10,15,20-triphenylprophyrin **TPP-Br**;

N,N'-dicyclohexylcarbodiimide (DCC; 98 mg; 0.48 mmol) was added to a chloroform solution (16 ml) containing **TPP-NH2** (200 mg; 0.32 mmol) and 3-bromopropionic acid (73 mg; 0.48 mmol) at -10_C. This solution was stirred at this temperature for 2 h, and then at 25_C for 19 h. After evaporation of chloroform, ethyl acetate was added to the residue. DCC precipitated was removed through the filtration, and evaporation of ethyl acetate left crude violet products. The purification by column chromatography was carried out like **TPP-NH2;** Yield 205 mg (74 %).

Elemental Analysis: H; 4.61 (4.54), C; 73.64 (74.79), N; 8.66 (9.38), where in parentheses are calcd. for C47H34N5OBr.

NMR; 8.84 (m, 8H), 8.21 (m, 8H), 7.91 (d, 2H), 7.78 (m, 9H), 7.60 (s, H), 3.85 (t, 2H), 3.12 (t, 2H), -2.78 (s, 2H).

5-{4-[3-(1'-methyl-4,4'-bipyridino)-ethylcarboxamido]phenyl}-10,15,20-triphenylporphyrin diiodide **mvep-TPP**;

A DMF solution (30 ml) containing **TPP-Br** (150 mg, 0.195 mmol) and 4(4'-pyridyl)-N-methylpyridinium iodide (2.95g, 9.9 mmol) was stirred at room temperature for 1 h, and then at 110_C for 7 h, under nitrogen atmosphere. Evaporation of DMF left crude violet crystals. After washing them with water, recrystallization from chloroform-methanol yielded the violet product; Yield 129 mg (59%).

Elemental Analysis: H; 4.22 (4.08), C; 62.17 (62.76), N; 8.61 (8.84), where in parentheses are calcd. for C58H45N7OI2.

NMR; 10.67 (s, 1H), 9.56 (d, 1H), 9.29 (d, 1H), 8.83 (m, 12H), 8.22 (m, 8H), 8.02 (d, 2H), 7.85 (m, 9H), 5.13 (t, 2H), 4.45 (s, 3H), 3.45 (s, 2H), -2.93 (s, 2H).

UV-Vis spectra; _max 414 (3.832 x 105), 512 (1.767 x 104), 547 (8470), 589 (5200), 645 (3790), where _max in nm and in parentheses are molar extinction coefficient (mol-1 l

dm-1).

5-{4-[3-(1'-methyl-4,4'-bipyridino)-ethylcarboxamido]phenyl}-10,15,20-triphenylporphyrin iron trichloride **1**;

A DMF solution (50 ml) containing **mvep-TPP** (66 mg, 0.71 mmol), FeCl3 (97 mg, 0.6 mmol), and CH3COONa (27 mg, 0.33 mmol) was stirred at 130_C for 8 h, under nitrogen atmosphere. After evaporation of DMF, the residue was dissolved into chloroform. The chloroform solution was washed with 2N hydrochloric acid. After evaporation of chloroform, the residue was dissolved into dichloromethane, and addition of hexane yielded brownish violet crystals. These crystals were dried at 100_C under vacuum; Yield 27 mg (38 %).

See footnote §3 for elemental analysis and UV-Vis spectra.
